# Supplementary material for: Interlaboratory study to validate a STR profiling method for intraspecies identification of mouse cell lines
Source: PLoS One. 2019 Jun 20;14(6):e0218412. doi: 10.1371/journal.pone.0218412 (PMC6586308; doi:10.1371/journal.pone.0218412)
Supplement: S3 Table — A pairwise comparison of the mouse cell lines and diploid mouse strains was performed using Master’s algorithm. (XLSX) [file pone.0218412.s007.xlsx]

## Sheet: Masters Algorithm Results
S3 Table. Pairwise comparison using Master's algorithm.
Highlighted cells show % matching of greater than 80%
			M01	M02	M03	M04	M05	M06	M07	M08	M09	M10	M11	M12	M14	M15	M16	M17	M19	M20	M21	M23	M24	M25	M26	M27	M28	M29	M30	M31	M32	M33	M34	M35	M36	M37	M38	M39	M40	M41	M42	M43	M46	M47	M49	M50	SWR/J	129P3/J	129S1/SvImJ
Sample#/Mouse strain	Cell Line	Cell line/Mouse strain	NCTC clone 929	A9	BALB/3T3 clone A31	L1210	CMT-93	3T3-Swiss albino	STO	P3X63Ag8.653	Sp2/0-Ag14	NMuMG	LL/2 (LLC1)	NIH/3T3	WEHI 164	P19	Hepa 1-6	M-NFS-60	Hepa-1c1c7	M-1	MLTC-1	JC	mIMCD-3	WEHI-13VAR	RAW 264.7 gamma NO(-)	MS1 (Mile Sven 1)	EOC 20	4T1	W-20-17	CT26.WT	CT26.CL25	EMT6	Renca	B16-F0	B16-F1	YAC-1	M1	BCL1 clone 5B1b	A20	CTLL-2	D10.G4.1	2E8	J558	P815	WEHI-3	RAW 264.7	SWR/J	129P3/J	129S1/SvImJ
M01	NCTC clone 929	C3H/An	1	0.846154	0.269231	0.423077	0.384615	0.384615	0.346154	0.230769	0.346154	0.423077	0.461538	0.346154	0.269231	0.653846	0.115385	0.538462	0.115385	0.307692	0.307692	0.230769	0.307692	0.269231	0.269231	0.346154	0.461538	0.269231	0.461538	0.307692	0.307692	0.192308	0.230769	0.307692	0.307692	0.346154	0.307692	0.307692	0.307692	0.269231	0.384615	0.346154	0.230769	0.5	0.384615	0.230769	0.230769	0.269231	0.269231
M02	A9	C3H/An	0.846154	1	0.346154	0.423077	0.384615	0.423077	0.346154	0.307692	0.384615	0.461538	0.461538	0.423077	0.307692	0.653846	0.115385	0.576923	0.115385	0.307692	0.346154	0.346154	0.307692	0.346154	0.307692	0.346154	0.538462	0.307692	0.461538	0.423077	0.423077	0.307692	0.384615	0.384615	0.384615	0.423077	0.307692	0.346154	0.423077	0.269231	0.423077	0.384615	0.307692	0.538462	0.423077	0.269231	0.230769	0.269231	0.269231
M03	BALB/3T3 clone A31	BALB/c	0.368421	0.473684	1	0.263158	0.421053	0.210526	0.263158	0.842105	0.842105	0.578947	0.368421	0.368421	0.684211	0.473684	0.210526	0.578947	0.157895	0.263158	0.368421	0.842105	0.421053	0.736842	0.894737	0.315789	0.263158	0.842105	0.473684	0.842105	0.842105	0.684211	0.894737	0.421053	0.421053	0.631579	0.421053	0.684211	0.894737	0.315789	0.315789	0.631579	0.947368	0.315789	0.789474	0.842105	0.210526	0.315789	0.263158
M04	L1210	DBA/2 (DBA subline 212)	0.5	0.5	0.227273	1	0.363636	0.318182	0.227273	0.363636	0.590909	0.545455	0.5	0.227273	0.272727	0.363636	0.136364	0.5	0.136364	0.318182	0.227273	0.227273	0.318182	0.363636	0.318182	0.363636	0.454545	0.181818	0.545455	0.318182	0.318182	0.272727	0.318182	0.363636	0.363636	0.272727	0.181818	0.272727	0.409091	0.272727	0.409091	0.227273	0.227273	0.681818	0.318182	0.272727	0.0909091	0.0454545	0.0454545
M05	CMT-93	C57BL/icrf	0.434783	0.434783	0.347826	0.347826	1	0.26087	0.173913	0.347826	0.478261	0.478261	0.826087	0.130435	0.347826	0.391304	0.347826	0.347826	0.347826	0.521739	0.652174	0.304348	0.565217	0.347826	0.391304	0.695652	0.304348	0.304348	0.73913	0.391304	0.391304	0.26087	0.347826	0.782609	0.782609	0.304348	0.304348	0.26087	0.347826	0.695652	0.304348	0.26087	0.304348	0.347826	0.478261	0.347826	0.130435	0.173913	0.173913
M06	3T3-Swiss albino	Swiss	0.384615	0.423077	0.153846	0.269231	0.230769	1	0.423077	0.115385	0.192308	0.346154	0.230769	0.538462	0.192308	0.346154	0.269231	0.576923	0.269231	0.230769	0.115385	0.0769231	0.269231	0.269231	0.192308	0.153846	0.346154	0.192308	0.346154	0.230769	0.230769	0.230769	0.192308	0.153846	0.153846	0.269231	0.269231	0.192308	0.192308	0.115385	0.384615	0.153846	0.115385	0.307692	0.269231	0.153846	0.384615	0.384615	0.346154
M07	STO	SIM (Sandos Inbred Mouse)	0.5	0.5	0.277778	0.277778	0.222222	0.611111	1	0.277778	0.388889	0.388889	0.222222	0.666667	0.277778	0.444444	0.0555556	0.555556	0.0555556	0.277778	0.166667	0.277778	0.333333	0.277778	0.333333	0.166667	0.333333	0.333333	0.277778	0.388889	0.388889	0.277778	0.333333	0.166667	0.166667	0.444444	0.444444	0.333333	0.277778	0.166667	0.388889	0.277778	0.277778	0.333333	0.388889	0.277778	0.444444	0.388889	0.333333
M08	P3X63Ag8.653	BALB/c	0.206897	0.275862	0.551724	0.275862	0.275862	0.103448	0.172414	1	0.827586	0.37931	0.37931	0.310345	0.551724	0.241379	0.137931	0.344828	0.103448	0.241379	0.310345	0.586207	0.37931	0.586207	0.517241	0.275862	0.206897	0.62069	0.37931	0.586207	0.551724	0.586207	0.758621	0.482759	0.448276	0.448276	0.241379	0.62069	0.586207	0.344828	0.241379	0.413793	0.551724	0.344828	0.689655	0.482759	0.172414	0.241379	0.206897
M09	Sp2/0-Ag14	BALB/c	0.25	0.277778	0.444444	0.361111	0.305556	0.138889	0.194444	0.666667	1	0.388889	0.388889	0.25	0.472222	0.25	0.166667	0.361111	0.138889	0.25	0.277778	0.472222	0.361111	0.527778	0.527778	0.305556	0.222222	0.5	0.388889	0.527778	0.5	0.5	0.583333	0.416667	0.416667	0.361111	0.222222	0.5	0.527778	0.305556	0.25	0.416667	0.444444	0.388889	0.611111	0.444444	0.194444	0.222222	0.194444
M10	NMuMG	NAMRU	0.44	0.48	0.44	0.48	0.44	0.36	0.28	0.44	0.56	1	0.52	0.28	0.44	0.28	0.2	0.48	0.16	0.28	0.36	0.36	0.36	0.4	0.52	0.4	0.32	0.44	0.52	0.48	0.44	0.48	0.48	0.44	0.44	0.52	0.36	0.36	0.56	0.32	0.36	0.36	0.44	0.52	0.56	0.48	0.24	0.16	0.12
M11	LL/2 (LLC1)	C57BL6	0.27907	0.27907	0.162791	0.255814	0.44186	0.139535	0.0930233	0.255814	0.325581	0.302326	1	0.0697674	0.209302	0.209302	0.186047	0.162791	0.209302	0.348837	0.44186	0.162791	0.348837	0.209302	0.209302	0.418605	0.116279	0.186047	0.44186	0.27907	0.27907	0.232558	0.255814	0.55814	0.55814	0.255814	0.186047	0.209302	0.255814	0.465116	0.209302	0.186047	0.139535	0.302326	0.325581	0.186047	0.139535	0.116279	0.116279
M12	NIH/3T3	Swiss	0.346154	0.423077	0.269231	0.192308	0.115385	0.538462	0.461538	0.346154	0.346154	0.269231	0.115385	1	0.192308	0.307692	0.269231	0.769231	0.269231	0.192308	0.115385	0.307692	0.307692	0.230769	0.346154	0.0769231	0.307692	0.307692	0.230769	0.307692	0.307692	0.230769	0.307692	0.153846	0.153846	0.230769	0.230769	0.307692	0.307692	0.115385	0.307692	0.230769	0.269231	0.307692	0.269231	0.269231	0.384615	0.384615	0.307692
M14	WEHI 164	BALB/c	0.304348	0.347826	0.565217	0.26087	0.347826	0.217391	0.217391	0.695652	0.73913	0.478261	0.391304	0.217391	1	0.347826	0.173913	0.391304	0.173913	0.217391	0.304348	0.521739	0.347826	0.913043	0.608696	0.26087	0.217391	0.73913	0.434783	0.73913	0.73913	0.652174	0.695652	0.391304	0.391304	0.565217	0.304348	0.521739	0.565217	0.26087	0.347826	0.478261	0.565217	0.26087	0.869565	0.608696	0.26087	0.304348	0.347826
M15	P19	C3H/He	0.772727	0.772727	0.409091	0.363636	0.409091	0.409091	0.363636	0.318182	0.409091	0.318182	0.409091	0.363636	0.363636	1	0.181818	0.545455	0.181818	0.363636	0.363636	0.363636	0.363636	0.409091	0.363636	0.318182	0.5	0.363636	0.454545	0.409091	0.409091	0.272727	0.409091	0.363636	0.363636	0.409091	0.318182	0.409091	0.409091	0.318182	0.409091	0.409091	0.363636	0.409091	0.409091	0.318182	0.181818	0.318182	0.318182
M16	Hepa 1-6	C57L	0.115385	0.115385	0.153846	0.115385	0.307692	0.269231	0.0384615	0.153846	0.230769	0.192308	0.307692	0.269231	0.153846	0.153846	1	0.269231	0.961538	0.153846	0.230769	0.115385	0.230769	0.192308	0.269231	0.192308	0.115385	0.192308	0.269231	0.230769	0.230769	0.115385	0.192308	0.230769	0.230769	0.0769231	0.192308	0.115385	0.230769	0.269231	0.384615	0.0769231	0.153846	0.192308	0.230769	0.192308	0.153846	0.153846	0.153846
M17	M-NFS-60	NFS/N (NFS X DBA/2) F1	0.424242	0.454545	0.333333	0.333333	0.242424	0.454545	0.30303	0.30303	0.393939	0.363636	0.212121	0.606061	0.272727	0.363636	0.212121	1	0.181818	0.242424	0.212121	0.272727	0.30303	0.30303	0.333333	0.212121	0.333333	0.333333	0.333333	0.333333	0.333333	0.212121	0.333333	0.212121	0.212121	0.242424	0.181818	0.272727	0.333333	0.181818	0.333333	0.212121	0.30303	0.424242	0.363636	0.272727	0.212121	0.272727	0.272727
M19	Hepa-1c1c7	C57L	0.111111	0.111111	0.111111	0.111111	0.296296	0.259259	0.037037	0.111111	0.185185	0.148148	0.333333	0.259259	0.148148	0.148148	0.925926	0.222222	1	0.148148	0.185185	0.111111	0.222222	0.185185	0.222222	0.185185	0.111111	0.148148	0.259259	0.222222	0.222222	0.111111	0.148148	0.259259	0.259259	0.0740741	0.148148	0.111111	0.185185	0.296296	0.37037	0.0740741	0.111111	0.148148	0.185185	0.148148	0.148148	0.148148	0.148148
M20	M-1	Tg(SV40E)Bri/7	0.421053	0.421053	0.263158	0.368421	0.631579	0.315789	0.263158	0.368421	0.473684	0.368421	0.789474	0.263158	0.263158	0.421053	0.210526	0.421053	0.210526	1	0.736842	0.210526	0.894737	0.315789	0.263158	0.736842	0.263158	0.315789	0.736842	0.368421	0.368421	0.263158	0.368421	0.736842	0.736842	0.315789	0.368421	0.315789	0.157895	0.736842	0.263158	0.210526	0.210526	0.473684	0.368421	0.210526	0.263158	0.263158	0.263158
M21	MLTC-1	C57BL/6	0.380952	0.428571	0.333333	0.238095	0.714286	0.142857	0.142857	0.428571	0.47619	0.428571	0.904762	0.142857	0.333333	0.380952	0.285714	0.333333	0.238095	0.666667	1	0.238095	0.666667	0.285714	0.285714	0.761905	0.190476	0.428571	0.714286	0.380952	0.380952	0.285714	0.428571	0.857143	0.857143	0.333333	0.380952	0.333333	0.285714	0.761905	0.285714	0.190476	0.285714	0.380952	0.47619	0.238095	0.142857	0.190476	0.190476
M23	JC	BALB/cRos	0.285714	0.428571	0.761905	0.238095	0.333333	0.0952381	0.238095	0.809524	0.809524	0.428571	0.333333	0.380952	0.571429	0.380952	0.142857	0.428571	0.142857	0.190476	0.238095	1	0.333333	0.619048	0.714286	0.238095	0.238095	0.666667	0.380952	0.809524	0.809524	0.714286	0.761905	0.380952	0.380952	0.571429	0.285714	0.666667	0.761905	0.285714	0.285714	0.666667	0.761905	0.285714	0.666667	0.666667	0.190476	0.285714	0.238095
M24	mIMCD-3	transgenic; Tg(SV40E)bri/7	0.347826	0.347826	0.347826	0.304348	0.565217	0.304348	0.26087	0.478261	0.565217	0.391304	0.652174	0.347826	0.347826	0.347826	0.26087	0.434783	0.26087	0.73913	0.608696	0.304348	1	0.391304	0.347826	0.608696	0.217391	0.434783	0.652174	0.434783	0.434783	0.347826	0.478261	0.608696	0.608696	0.347826	0.347826	0.434783	0.26087	0.608696	0.304348	0.217391	0.304348	0.434783	0.478261	0.304348	0.26087	0.391304	0.304348
M25	WEHI-13VAR	BALB/c	0.291667	0.375	0.583333	0.333333	0.333333	0.291667	0.208333	0.708333	0.791667	0.416667	0.375	0.25	0.875	0.375	0.208333	0.416667	0.208333	0.25	0.25	0.541667	0.375	1	0.625	0.25	0.25	0.666667	0.416667	0.708333	0.708333	0.666667	0.666667	0.375	0.375	0.541667	0.291667	0.541667	0.583333	0.25	0.416667	0.5	0.583333	0.333333	0.791667	0.625	0.25	0.291667	0.333333
M26	RAW 264.7 gamma NO(-)	BALB/c	0.304348	0.347826	0.73913	0.304348	0.391304	0.217391	0.26087	0.652174	0.826087	0.565217	0.391304	0.391304	0.608696	0.347826	0.304348	0.478261	0.26087	0.217391	0.26087	0.652174	0.347826	0.652174	1	0.26087	0.26087	0.652174	0.521739	0.695652	0.695652	0.565217	0.652174	0.304348	0.304348	0.521739	0.391304	0.521739	0.73913	0.304348	0.304348	0.521739	0.73913	0.347826	0.73913	0.826087	0.26087	0.304348	0.26087
M27	MS1 (Mile Sven 1)	C57BL/6	0.428571	0.428571	0.285714	0.380952	0.761905	0.190476	0.142857	0.380952	0.52381	0.47619	0.857143	0.0952381	0.285714	0.333333	0.238095	0.333333	0.238095	0.666667	0.761905	0.238095	0.666667	0.285714	0.285714	1	0.285714	0.285714	0.857143	0.428571	0.380952	0.285714	0.380952	0.809524	0.809524	0.333333	0.333333	0.285714	0.285714	0.761905	0.380952	0.190476	0.238095	0.47619	0.428571	0.238095	0.142857	0.190476	0.190476
M28	EOC 20	C3H/HeJ	0.631579	0.736842	0.263158	0.526316	0.368421	0.473684	0.315789	0.315789	0.421053	0.421053	0.263158	0.421053	0.263158	0.578947	0.157895	0.578947	0.157895	0.263158	0.210526	0.263158	0.263158	0.315789	0.315789	0.315789	1	0.157895	0.473684	0.263158	0.263158	0.263158	0.368421	0.421053	0.421053	0.315789	0.210526	0.210526	0.368421	0.210526	0.473684	0.210526	0.263158	0.368421	0.421053	0.263158	0.210526	0.263158	0.210526
M29	4T1	BALB/cfC3H	0.291667	0.333333	0.666667	0.166667	0.291667	0.208333	0.25	0.75	0.75	0.458333	0.333333	0.333333	0.708333	0.333333	0.208333	0.458333	0.166667	0.25	0.375	0.583333	0.416667	0.666667	0.625	0.25	0.125	1	0.416667	0.75	0.75	0.666667	0.791667	0.333333	0.333333	0.5	0.333333	0.666667	0.625	0.25	0.25	0.458333	0.625	0.25	0.791667	0.583333	0.25	0.291667	0.25
M30	W-20-17	W++	0.413793	0.413793	0.310345	0.413793	0.586207	0.310345	0.172414	0.37931	0.482759	0.448276	0.655172	0.206897	0.344828	0.344828	0.241379	0.37931	0.241379	0.482759	0.517241	0.275862	0.517241	0.344828	0.413793	0.62069	0.310345	0.344828	1	0.37931	0.37931	0.344828	0.344828	0.551724	0.551724	0.37931	0.310345	0.344828	0.310345	0.586207	0.37931	0.241379	0.275862	0.37931	0.482759	0.310345	0.241379	0.275862	0.275862
M31	CT26.WT	BALB/c	0.266667	0.366667	0.533333	0.233333	0.3	0.2	0.233333	0.566667	0.633333	0.4	0.4	0.266667	0.566667	0.3	0.2	0.366667	0.2	0.233333	0.266667	0.566667	0.333333	0.566667	0.533333	0.3	0.166667	0.6	0.366667	1	0.866667	0.533333	0.666667	0.4	0.366667	0.5	0.266667	0.5	0.6	0.233333	0.233333	0.433333	0.5	0.3	0.6	0.466667	0.233333	0.266667	0.233333
M32	CT26.CL25	BALB/c	0.307692	0.423077	0.615385	0.269231	0.346154	0.230769	0.269231	0.615385	0.692308	0.423077	0.461538	0.307692	0.653846	0.346154	0.230769	0.423077	0.230769	0.269231	0.307692	0.653846	0.384615	0.653846	0.615385	0.307692	0.192308	0.692308	0.423077	1	1	0.615385	0.653846	0.423077	0.384615	0.538462	0.307692	0.576923	0.615385	0.269231	0.269231	0.461538	0.576923	0.307692	0.692308	0.538462	0.269231	0.307692	0.269231
M33	EMT6	BALB/cCrgl	0.227273	0.363636	0.590909	0.272727	0.272727	0.272727	0.227273	0.772727	0.818182	0.545455	0.454545	0.272727	0.681818	0.272727	0.136364	0.318182	0.136364	0.227273	0.272727	0.681818	0.363636	0.727273	0.590909	0.272727	0.227273	0.727273	0.454545	0.727273	0.727273	1	0.727273	0.363636	0.363636	0.636364	0.272727	0.681818	0.681818	0.272727	0.272727	0.5	0.590909	0.318182	0.772727	0.636364	0.318182	0.272727	0.227273
M34	Renca	BALB/cCr	0.181818	0.30303	0.515152	0.212121	0.242424	0.151515	0.181818	0.666667	0.636364	0.363636	0.333333	0.242424	0.484848	0.272727	0.151515	0.333333	0.121212	0.212121	0.272727	0.484848	0.333333	0.484848	0.454545	0.242424	0.212121	0.575758	0.30303	0.606061	0.515152	0.484848	1	0.424242	0.424242	0.393939	0.272727	0.454545	0.606061	0.333333	0.212121	0.393939	0.484848	0.30303	0.575758	0.424242	0.212121	0.212121	0.181818
M35	B16-F0	C57BL/6J	0.235294	0.294118	0.235294	0.235294	0.529412	0.117647	0.0882353	0.411765	0.441176	0.323529	0.705882	0.117647	0.264706	0.235294	0.176471	0.205882	0.205882	0.411765	0.529412	0.235294	0.411765	0.264706	0.205882	0.5	0.235294	0.235294	0.470588	0.352941	0.323529	0.235294	0.411765	1	0.941176	0.264706	0.205882	0.205882	0.264706	0.529412	0.235294	0.205882	0.205882	0.323529	0.411765	0.176471	0.0882353	0.117647	0.117647
M36	B16-F1	C57BL/6J	0.25	0.3125	0.25	0.25	0.5625	0.125	0.09375	0.40625	0.46875	0.34375	0.75	0.125	0.28125	0.25	0.1875	0.21875	0.21875	0.4375	0.5625	0.25	0.4375	0.28125	0.21875	0.53125	0.25	0.25	0.5	0.34375	0.3125	0.25	0.4375	1	1	0.28125	0.21875	0.21875	0.28125	0.5625	0.25	0.21875	0.21875	0.34375	0.40625	0.1875	0.09375	0.125	0.125
M37	YAC-1	A/Sn	0.428571	0.52381	0.571429	0.285714	0.333333	0.333333	0.380952	0.619048	0.619048	0.619048	0.52381	0.285714	0.619048	0.428571	0.0952381	0.380952	0.0952381	0.285714	0.333333	0.571429	0.380952	0.619048	0.571429	0.333333	0.285714	0.571429	0.52381	0.714286	0.666667	0.666667	0.619048	0.428571	0.428571	1	0.428571	0.52381	0.619048	0.285714	0.380952	0.428571	0.571429	0.333333	0.714286	0.52381	0.333333	0.333333	0.285714
M38	M1	SL	0.363636	0.363636	0.363636	0.181818	0.318182	0.318182	0.363636	0.318182	0.363636	0.409091	0.363636	0.272727	0.318182	0.318182	0.227273	0.272727	0.181818	0.318182	0.363636	0.272727	0.363636	0.318182	0.409091	0.318182	0.181818	0.363636	0.409091	0.363636	0.363636	0.272727	0.409091	0.318182	0.318182	0.409091	1	0.272727	0.363636	0.318182	0.454545	0.318182	0.363636	0.227273	0.454545	0.363636	0.363636	0.409091	0.363636
M39	BCL1 clone 5B1b	BALB/c	0.363636	0.409091	0.590909	0.272727	0.272727	0.227273	0.272727	0.818182	0.818182	0.409091	0.409091	0.363636	0.545455	0.409091	0.136364	0.409091	0.136364	0.272727	0.318182	0.636364	0.454545	0.590909	0.545455	0.272727	0.181818	0.727273	0.454545	0.681818	0.681818	0.681818	0.681818	0.318182	0.318182	0.5	0.272727	1	0.590909	0.318182	0.272727	0.409091	0.545455	0.363636	0.681818	0.5	0.227273	0.318182	0.272727
M40	A20	BALB/cAnN	0.285714	0.392857	0.607143	0.321429	0.285714	0.178571	0.178571	0.607143	0.678571	0.5	0.392857	0.285714	0.464286	0.321429	0.214286	0.392857	0.178571	0.107143	0.214286	0.571429	0.214286	0.5	0.607143	0.214286	0.25	0.535714	0.321429	0.642857	0.571429	0.535714	0.714286	0.321429	0.321429	0.464286	0.285714	0.464286	1	0.214286	0.25	0.464286	0.607143	0.357143	0.535714	0.571429	0.214286	0.214286	0.178571
M41	CTLL-2	C57BL/6	0.259259	0.259259	0.222222	0.222222	0.592593	0.111111	0.111111	0.37037	0.407407	0.296296	0.740741	0.111111	0.222222	0.259259	0.259259	0.222222	0.296296	0.518519	0.592593	0.222222	0.518519	0.222222	0.259259	0.592593	0.148148	0.222222	0.62963	0.259259	0.259259	0.222222	0.407407	0.666667	0.666667	0.222222	0.259259	0.259259	0.222222	1	0.259259	0.185185	0.185185	0.296296	0.333333	0.222222	0.111111	0.148148	0.148148
M42	D10.G4.1	AKR/J	0.344828	0.37931	0.206897	0.310345	0.241379	0.344828	0.241379	0.241379	0.310345	0.310345	0.310345	0.275862	0.275862	0.310345	0.344828	0.37931	0.344828	0.172414	0.206897	0.206897	0.241379	0.344828	0.241379	0.275862	0.310345	0.206897	0.37931	0.241379	0.241379	0.206897	0.241379	0.275862	0.275862	0.275862	0.344828	0.206897	0.241379	0.241379	1	0.206897	0.206897	0.344828	0.344828	0.206897	0.137931	0.241379	0.206897
M43	2E8	BALB/c.xid	0.45	0.5	0.6	0.25	0.3	0.2	0.25	0.6	0.75	0.45	0.4	0.3	0.55	0.45	0.1	0.35	0.1	0.2	0.2	0.7	0.25	0.6	0.6	0.2	0.2	0.55	0.35	0.65	0.6	0.55	0.65	0.35	0.35	0.45	0.35	0.45	0.65	0.25	0.3	1	0.6	0.35	0.65	0.6	0.35	0.3	0.25
M46	J558	BALB/c	0.333333	0.444444	1	0.277778	0.388889	0.166667	0.277778	0.888889	0.888889	0.611111	0.333333	0.388889	0.722222	0.444444	0.222222	0.555556	0.166667	0.222222	0.333333	0.888889	0.388889	0.777778	0.944444	0.277778	0.277778	0.833333	0.444444	0.833333	0.833333	0.722222	0.888889	0.388889	0.388889	0.666667	0.444444	0.666667	0.944444	0.277778	0.333333	0.666667	1	0.333333	0.833333	0.888889	0.222222	0.333333	0.277778
M47	P815	DBA/2	0.481481	0.518519	0.222222	0.555556	0.296296	0.296296	0.222222	0.37037	0.518519	0.481481	0.481481	0.296296	0.222222	0.333333	0.185185	0.518519	0.148148	0.333333	0.296296	0.222222	0.37037	0.296296	0.296296	0.37037	0.259259	0.222222	0.407407	0.333333	0.296296	0.259259	0.37037	0.407407	0.407407	0.259259	0.185185	0.296296	0.37037	0.296296	0.37037	0.259259	0.222222	1	0.333333	0.222222	0.111111	0.185185	0.185185
M49	WEHI-3	BALB/c	0.277778	0.305556	0.416667	0.194444	0.305556	0.194444	0.194444	0.555556	0.611111	0.388889	0.388889	0.194444	0.555556	0.25	0.166667	0.333333	0.138889	0.194444	0.277778	0.388889	0.305556	0.527778	0.472222	0.25	0.222222	0.527778	0.388889	0.5	0.5	0.472222	0.527778	0.388889	0.361111	0.416667	0.277778	0.416667	0.416667	0.25	0.277778	0.361111	0.416667	0.25	1	0.416667	0.222222	0.25	0.25
M50	RAW 264.7	BALB/c	0.3	0.35	0.8	0.3	0.4	0.2	0.25	0.7	0.8	0.6	0.4	0.35	0.7	0.35	0.25	0.45	0.2	0.2	0.25	0.7	0.35	0.75	0.95	0.25	0.25	0.7	0.45	0.7	0.7	0.7	0.7	0.3	0.3	0.55	0.4	0.55	0.8	0.3	0.3	0.6	0.8	0.3	0.75	1	0.25	0.3	0.25
SWR/J		SWR/J	0.333333	0.333333	0.222222	0.111111	0.166667	0.555556	0.444444	0.277778	0.388889	0.333333	0.333333	0.555556	0.333333	0.222222	0.222222	0.388889	0.222222	0.277778	0.166667	0.222222	0.333333	0.333333	0.333333	0.166667	0.222222	0.333333	0.388889	0.388889	0.388889	0.388889	0.388889	0.166667	0.166667	0.388889	0.444444	0.277778	0.333333	0.166667	0.222222	0.388889	0.222222	0.166667	0.444444	0.277778	1	0.5	0.444444
129P3/J		129P3/J	0.388889	0.388889	0.333333	0.0555556	0.222222	0.555556	0.388889	0.388889	0.444444	0.222222	0.277778	0.555556	0.388889	0.388889	0.222222	0.5	0.222222	0.277778	0.222222	0.333333	0.5	0.388889	0.388889	0.222222	0.277778	0.388889	0.444444	0.444444	0.444444	0.333333	0.388889	0.222222	0.222222	0.388889	0.5	0.388889	0.333333	0.222222	0.388889	0.333333	0.333333	0.277778	0.5	0.333333	0.5	1	0.888889
129S1/SvImJ		129S1/SvImJ	0.388889	0.388889	0.277778	0.0555556	0.222222	0.5	0.333333	0.333333	0.388889	0.166667	0.277778	0.444444	0.444444	0.388889	0.222222	0.5	0.222222	0.277778	0.222222	0.277778	0.388889	0.444444	0.333333	0.222222	0.222222	0.333333	0.444444	0.388889	0.388889	0.277778	0.333333	0.222222	0.222222	0.333333	0.444444	0.333333	0.277778	0.222222	0.333333	0.277778	0.277778	0.277778	0.5	0.277778	0.444444	0.888889	1
BALB/cJ		BALB/cJ	0.333333	0.333333	0.52381	0.428571	0.190476	0.333333	0.190476	0.619048	0.761905	0.428571	0.285714	0.333333	0.47619	0.428571	0.238095	0.619048	0.190476	0.190476	0.238095	0.428571	0.333333	0.52381	0.52381	0.142857	0.190476	0.619048	0.380952	0.619048	0.571429	0.52381	0.619048	0.190476	0.190476	0.428571	0.142857	0.571429	0.571429	0.142857	0.238095	0.380952	0.47619	0.47619	0.571429	0.428571	0.142857	0.190476	0.142857
Balb/c Zyagen		Balb/c Zyagen	0.315789	0.421053	0.736842	0.421053	0.368421	0.263158	0.210526	0.684211	0.736842	0.473684	0.368421	0.368421	0.631579	0.421053	0.210526	0.473684	0.210526	0.263158	0.210526	0.684211	0.315789	0.736842	0.736842	0.210526	0.263158	0.631579	0.368421	0.842105	0.736842	0.578947	0.684211	0.315789	0.315789	0.526316	0.263158	0.473684	0.789474	0.210526	0.315789	0.631579	0.736842	0.315789	0.631579	0.684211	0.157895	0.157895	0.157895
Balb/c-Male Zyagen		Balb/c-Male Zyagen	0.526316	0.526316	0.421053	0.684211	0.315789	0.210526	0.263158	0.473684	0.578947	0.578947	0.421053	0.368421	0.368421	0.473684	0.210526	0.789474	0.157895	0.263158	0.315789	0.368421	0.368421	0.421053	0.473684	0.263158	0.368421	0.315789	0.421053	0.421053	0.421053	0.263158	0.368421	0.368421	0.368421	0.368421	0.263158	0.368421	0.578947	0.315789	0.473684	0.263158	0.421053	0.631579	0.421053	0.421053	0.0526316	0.157895	0.157895
Balb/c-Female Zyagen		Balb/c-Female Zyagen	0.526316	0.526316	0.421053	0.684211	0.315789	0.210526	0.263158	0.473684	0.578947	0.578947	0.421053	0.368421	0.368421	0.473684	0.210526	0.789474	0.157895	0.263158	0.315789	0.368421	0.368421	0.421053	0.473684	0.263158	0.368421	0.315789	0.421053	0.421053	0.421053	0.263158	0.368421	0.368421	0.368421	0.368421	0.263158	0.368421	0.578947	0.315789	0.473684	0.263158	0.421053	0.631579	0.421053	0.421053	0.0526316	0.157895	0.157895
BUB/BnJ		BUB/BnJ	0.333333	0.388889	0.0555556	0.277778	0.166667	0.666667	0.333333	0.0555556	0.166667	0.222222	0.277778	0.555556	0.166667	0.333333	0.333333	0.555556	0.388889	0.277778	0.111111	0.0555556	0.277778	0.222222	0.111111	0.111111	0.277778	0.111111	0.333333	0.166667	0.166667	0.166667	0.111111	0.166667	0.166667	0.166667	0.333333	0.0555556	0.166667	0.111111	0.555556	0.277778	0.0555556	0.333333	0.166667	0.111111	0.388889	0.388889	0.333333
C3H/HeJ		C3H/HeJ	0.666667	0.722222	0.277778	0.555556	0.388889	0.5	0.333333	0.333333	0.444444	0.444444	0.277778	0.444444	0.277778	0.666667	0.166667	0.611111	0.166667	0.277778	0.222222	0.277778	0.277778	0.333333	0.333333	0.333333	0.944444	0.166667	0.5	0.277778	0.277778	0.277778	0.388889	0.388889	0.388889	0.333333	0.166667	0.222222	0.388889	0.222222	0.5	0.222222	0.277778	0.388889	0.388889	0.277778	0.222222	0.277778	0.222222
C57BL/6J		C57BL/6J	0.421053	0.473684	0.315789	0.473684	0.736842	0.157895	0.157895	0.421053	0.526316	0.473684	0.842105	0.157895	0.315789	0.315789	0.263158	0.368421	0.263158	0.631579	0.684211	0.315789	0.631579	0.368421	0.368421	0.894737	0.368421	0.263158	0.842105	0.421053	0.421053	0.315789	0.368421	0.789474	0.789474	0.368421	0.315789	0.210526	0.315789	0.736842	0.421053	0.210526	0.315789	0.526316	0.473684	0.315789	0.157895	0.210526	0.210526
C57BL/6J -Male Zyagen		C57BL/6J -Male Zyagen	0.454545	0.5	0.272727	0.318182	0.636364	0.227273	0.136364	0.272727	0.409091	0.5	0.863636	0.0909091	0.227273	0.318182	0.272727	0.363636	0.318182	0.5	0.636364	0.227273	0.5	0.227273	0.272727	0.636364	0.227273	0.318182	0.590909	0.363636	0.363636	0.272727	0.363636	0.727273	0.727273	0.318182	0.318182	0.227273	0.272727	0.590909	0.272727	0.181818	0.227273	0.545455	0.409091	0.227273	0.136364	0.181818	0.181818
C57BL/6J -Female Zyagen		C57BL/6J -Female Zyagen	0.473684	0.526316	0.210526	0.421053	0.736842	0.315789	0.157895	0.210526	0.421053	0.526316	0.947368	0.105263	0.263158	0.315789	0.263158	0.315789	0.315789	0.578947	0.631579	0.210526	0.526316	0.263158	0.263158	0.684211	0.263158	0.315789	0.684211	0.421053	0.421053	0.315789	0.315789	0.684211	0.684211	0.315789	0.315789	0.210526	0.263158	0.631579	0.263158	0.263158	0.157895	0.473684	0.421053	0.210526	0.210526	0.157895	0.157895
C57L/J		C57L/J	0.222222	0.222222	0.111111	0.111111	0.388889	0.222222	0.111111	0.0555556	0.166667	0.222222	0.5	0.111111	0.222222	0.222222	0.833333	0.111111	0.833333	0.166667	0.277778	0.0555556	0.166667	0.222222	0.277778	0.277778	0.0555556	0.166667	0.333333	0.277778	0.277778	0.166667	0.111111	0.277778	0.277778	0.166667	0.222222	0.0555556	0.222222	0.333333	0.333333	0.166667	0.111111	0.222222	0.333333	0.222222	0.166667	0.166667	0.222222
CBA/J		CBA/J	0.5	0.5	0.333333	0.388889	0.166667	0.277778	0.333333	0.388889	0.611111	0.222222	0.277778	0.5	0.277778	0.444444	0.333333	0.555556	0.333333	0.111111	0.0555556	0.388889	0.166667	0.333333	0.5	0.0555556	0.444444	0.388889	0.277778	0.444444	0.444444	0.277778	0.388889	0.166667	0.166667	0.222222	0.166667	0.388889	0.444444	0.111111	0.277778	0.277778	0.333333	0.333333	0.388889	0.388889	0.222222	0.222222	0.277778
DBA/1J		DBA/1J	0.666667	0.722222	0.444444	0.611111	0.444444	0.333333	0.333333	0.5	0.555556	0.611111	0.5	0.333333	0.5	0.611111	0.166667	0.611111	0.166667	0.333333	0.388889	0.5	0.388889	0.555556	0.5	0.444444	0.555556	0.333333	0.611111	0.611111	0.611111	0.444444	0.333333	0.5	0.5	0.555556	0.222222	0.444444	0.444444	0.333333	0.555556	0.388889	0.444444	0.611111	0.5	0.444444	0.166667	0.222222	0.222222
I/LnJ		I/LnJ	0.333333	0.388889	0.277778	0.166667	0.166667	0.277778	0.222222	0.444444	0.388889	0.277778	0.388889	0.166667	0.444444	0.388889	0.222222	0.277778	0.222222	0.111111	0.277778	0.333333	0.333333	0.444444	0.222222	0.222222	0.166667	0.388889	0.333333	0.388889	0.388889	0.333333	0.444444	0.222222	0.222222	0.388889	0.5	0.5	0.333333	0.222222	0.611111	0.277778	0.277778	0.277778	0.444444	0.222222	0.222222	0.444444	0.444444
KK/H1J		KK/H1J	0.111111	0.111111	0.222222	0.277778	0.222222	0.277778	0.166667	0.222222	0.333333	0.388889	0.333333	0.277778	0.333333	0.0555556	0.333333	0.333333	0.333333	0.111111	0.111111	0.166667	0.111111	0.333333	0.333333	0.166667	0.0555556	0.222222	0.277778	0.333333	0.333333	0.333333	0.111111	0.166667	0.166667	0.222222	0.277778	0.166667	0.277778	0.111111	0.222222	0.166667	0.222222	0.277778	0.388889	0.277778	0.277778	0.111111	0.111111
LG/J		LG/J	0.555556	0.611111	0.222222	0.333333	0.277778	0.333333	0.277778	0.388889	0.333333	0.388889	0.611111	0.333333	0.388889	0.444444	0.222222	0.444444	0.222222	0.277778	0.333333	0.333333	0.388889	0.388889	0.277778	0.333333	0.388889	0.333333	0.444444	0.388889	0.388889	0.444444	0.5	0.333333	0.333333	0.444444	0.277778	0.388889	0.444444	0.444444	0.388889	0.333333	0.222222	0.444444	0.388889	0.277778	0.333333	0.333333	0.333333
LP/J		LP/J	0.333333	0.333333	0.222222	0.0555556	0.222222	0.444444	0.222222	0.222222	0.277778	0.111111	0.333333	0.333333	0.277778	0.333333	0.166667	0.333333	0.166667	0.333333	0.222222	0.166667	0.333333	0.277778	0.222222	0.222222	0.222222	0.277778	0.444444	0.333333	0.333333	0.222222	0.277778	0.277778	0.277778	0.333333	0.333333	0.277778	0.166667	0.222222	0.222222	0.222222	0.166667	0.166667	0.388889	0.166667	0.444444	0.555556	0.611111
LT/SvEi		LT/SvEi	0.368421	0.368421	0.421053	0.368421	0.368421	0.210526	0.368421	0.421053	0.578947	0.315789	0.526316	0.315789	0.421053	0.315789	0.210526	0.315789	0.210526	0.368421	0.315789	0.368421	0.368421	0.421053	0.473684	0.368421	0.315789	0.421053	0.421053	0.526316	0.526316	0.368421	0.473684	0.421053	0.421053	0.315789	0.368421	0.368421	0.473684	0.315789	0.315789	0.263158	0.421053	0.315789	0.473684	0.368421	0.263158	0.315789	0.315789
NZB/BlNJ		NZB/BlNJ	0.210526	0.210526	0.210526	0.105263	0.210526	0.263158	0.105263	0.210526	0.210526	0.210526	0.315789	0.210526	0.210526	0.210526	0.210526	0.368421	0.210526	0.263158	0.263158	0.105263	0.210526	0.157895	0.157895	0.263158	0.210526	0.210526	0.368421	0.263158	0.263158	0.210526	0.210526	0.315789	0.315789	0.157895	0.263158	0.210526	0.157895	0.210526	0.210526	0.105263	0.157895	0.263158	0.210526	0.210526	0.157895	0.263158	0.210526
P/J		P/J	0.388889	0.444444	0.444444	0.333333	0.444444	0.222222	0.277778	0.388889	0.388889	0.333333	0.388889	0.388889	0.277778	0.444444	0.222222	0.5	0.222222	0.277778	0.333333	0.444444	0.388889	0.333333	0.444444	0.333333	0.388889	0.333333	0.444444	0.388889	0.388889	0.222222	0.444444	0.388889	0.388889	0.333333	0.333333	0.277778	0.444444	0.333333	0.277778	0.333333	0.444444	0.222222	0.333333	0.388889	0.222222	0.166667	0.222222
SM/J		SM/J	0.444444	0.5	0.333333	0.222222	0.166667	0.222222	0.222222	0.388889	0.388889	0.222222	0.277778	0.388889	0.388889	0.388889	0.166667	0.444444	0.166667	0.222222	0.166667	0.333333	0.277778	0.444444	0.388889	0.166667	0.388889	0.333333	0.277778	0.5	0.444444	0.277778	0.388889	0.277778	0.277778	0.333333	0.277778	0.277778	0.277778	0.166667	0.222222	0.388889	0.333333	0.222222	0.444444	0.388889	0.222222	0.277778	0.333333
WSB/EiJ		WSB/EiJ	0.222222	0.277778	0.111111	0.111111	0.222222	0	0.166667	0.222222	0.222222	0.111111	0.333333	0.222222	0.111111	0.166667	0.222222	0.166667	0.222222	0.166667	0.166667	0.277778	0.166667	0.111111	0.166667	0.166667	0.0555556	0.166667	0.277778	0.277778	0.277778	0.166667	0.166667	0.166667	0.166667	0.111111	0.222222	0.277778	0.166667	0.277778	0.222222	0.166667	0.111111	0.166667	0.222222	0.166667	0	0.0555556	0.0555556
A/J		A/J	0.421053	0.473684	0.526316	0.315789	0.421053	0.315789	0.263158	0.578947	0.631579	0.578947	0.421053	0.368421	0.526316	0.368421	0.157895	0.421053	0.157895	0.263158	0.315789	0.526316	0.368421	0.526316	0.526316	0.368421	0.315789	0.526316	0.578947	0.526316	0.526316	0.526316	0.473684	0.368421	0.368421	0.736842	0.263158	0.578947	0.526316	0.263158	0.263158	0.368421	0.526316	0.315789	0.684211	0.473684	0.315789	0.263158	0.210526
NOD/ShiLtJ		NOD/ShiLtJ	0.277778	0.333333	0.222222	0.166667	0.222222	0.444444	0.277778	0.222222	0.333333	0.388889	0.333333	0.333333	0.277778	0.222222	0.166667	0.222222	0.166667	0.222222	0.166667	0.277778	0.222222	0.277778	0.333333	0.222222	0.333333	0.166667	0.388889	0.277778	0.277778	0.277778	0.222222	0.277778	0.277778	0.444444	0.5	0.222222	0.277778	0.166667	0.388889	0.222222	0.222222	0.166667	0.444444	0.222222	0.444444	0.333333	0.388889
NZO/HlLtJ		NZO/HlLtJ	0.421053	0.421053	0.315789	0.157895	0.315789	0.263158	0.210526	0.315789	0.473684	0.368421	0.473684	0.315789	0.210526	0.368421	0.263158	0.421053	0.210526	0.315789	0.368421	0.263158	0.315789	0.210526	0.368421	0.315789	0.210526	0.368421	0.421053	0.368421	0.368421	0.315789	0.263158	0.315789	0.315789	0.263158	0.263158	0.421053	0.263158	0.315789	0.315789	0.210526	0.263158	0.421053	0.421053	0.315789	0.157895	0.263158	0.210526
CD1/ICR M1		CD1/ICR M1	0.24	0.32	0.2	0.24	0.12	0.56	0.28	0.16	0.28	0.28	0.16	0.6	0.2	0.24	0.36	0.64	0.4	0.2	0.08	0.16	0.24	0.24	0.28	0.08	0.32	0.16	0.2	0.28	0.28	0.16	0.28	0.2	0.2	0.2	0.16	0.16	0.24	0.08	0.36	0.16	0.2	0.32	0.24	0.16	0.4	0.28	0.28
CD1/ICR F1		CD1/ICR F1	0.307692	0.384615	0.230769	0.230769	0.192308	0.538462	0.307692	0.346154	0.384615	0.230769	0.269231	0.538462	0.269231	0.307692	0.269231	0.538462	0.269231	0.269231	0.153846	0.269231	0.346154	0.346154	0.230769	0.153846	0.269231	0.269231	0.269231	0.307692	0.307692	0.269231	0.384615	0.269231	0.269231	0.269231	0.269231	0.269231	0.269231	0.192308	0.346154	0.269231	0.230769	0.269231	0.307692	0.192308	0.346154	0.346154	0.384615
CD1/ICR M2		CD1/ICR M2	0.227273	0.227273	0.136364	0.227273	0.0909091	0.590909	0.272727	0.181818	0.227273	0.181818	0.0909091	0.545455	0.181818	0.272727	0.318182	0.590909	0.318182	0.181818	0.0454545	0.136364	0.227273	0.227273	0.181818	0.0454545	0.272727	0.136364	0.227273	0.181818	0.181818	0.136364	0.181818	0.0909091	0.0909091	0.136364	0.0909091	0.227273	0.136364	0.0454545	0.272727	0.0909091	0.136364	0.272727	0.181818	0.0909091	0.318182	0.363636	0.363636
CD1/ICR F2		CD1/ICR F2	0.227273	0.272727	0.136364	0.227273	0.0454545	0.590909	0.272727	0.181818	0.227273	0.181818	0.0454545	0.590909	0.181818	0.272727	0.272727	0.636364	0.318182	0.181818	0.0454545	0.136364	0.227273	0.227273	0.181818	0.0454545	0.318182	0.136364	0.227273	0.181818	0.181818	0.181818	0.181818	0.0909091	0.0909091	0.136364	0.0909091	0.227273	0.181818	0.0454545	0.272727	0.0909091	0.136364	0.272727	0.181818	0.0909091	0.318182	0.363636	0.363636
AKR		AKR	0.388889	0.388889	0.111111	0.277778	0.222222	0.444444	0.333333	0.166667	0.222222	0.277778	0.277778	0.333333	0.166667	0.388889	0.277778	0.5	0.277778	0.277778	0.222222	0.166667	0.333333	0.222222	0.166667	0.277778	0.222222	0.166667	0.444444	0.222222	0.222222	0.111111	0.111111	0.222222	0.222222	0.277778	0.333333	0.277778	0.111111	0.277778	0.888889	0.111111	0.111111	0.333333	0.333333	0.111111	0.166667	0.277778	0.277778
ALR		ALR	0.277778	0.333333	0.111111	0.222222	0.166667	0.611111	0.277778	0.166667	0.222222	0.277778	0.111111	0.5	0.111111	0.166667	0.222222	0.444444	0.222222	0.166667	0.0555556	0.111111	0.222222	0.111111	0.166667	0.166667	0.388889	0.0555556	0.333333	0.111111	0.111111	0.166667	0.111111	0.111111	0.111111	0.277778	0.166667	0.166667	0.166667	0.0555556	0.444444	0.0555556	0.111111	0.222222	0.277778	0.111111	0.333333	0.277778	0.222222
BTBR		BTBR	0.3	0.3	0.3	0.2	0.2	0.4	0.3	0.45	0.5	0.3	0.3	0.45	0.3	0.3	0.15	0.4	0.15	0.35	0.25	0.35	0.5	0.3	0.3	0.25	0.35	0.4	0.5	0.4	0.4	0.45	0.4	0.3	0.3	0.4	0.25	0.45	0.25	0.3	0.35	0.25	0.25	0.2	0.5	0.25	0.3	0.4	0.3
C58		C58	0.333333	0.388889	0.277778	0.222222	0.555556	0.333333	0.277778	0.222222	0.222222	0.277778	0.666667	0.277778	0.111111	0.333333	0.222222	0.388889	0.277778	0.388889	0.388889	0.333333	0.333333	0.111111	0.222222	0.388889	0.222222	0.222222	0.388889	0.333333	0.333333	0.166667	0.333333	0.611111	0.611111	0.277778	0.277778	0.333333	0.333333	0.444444	0.277778	0.111111	0.222222	0.277778	0.166667	0.166667	0.166667	0.111111	0.111111
CE		CE	0.277778	0.277778	0.111111	0.277778	0.166667	0.388889	0.222222	0.166667	0.333333	0.277778	0.277778	0.277778	0.111111	0.222222	0.111111	0.333333	0.111111	0.111111	0.166667	0.111111	0.111111	0.166667	0.166667	0.222222	0.222222	0.0555556	0.222222	0.111111	0.111111	0.222222	0.0555556	0.166667	0.166667	0.277778	0.166667	0.222222	0.111111	0.0555556	0.333333	0	0.111111	0.277778	0.166667	0.166667	0.166667	0.166667	0.166667
FVB		FVB	0.5	0.5	0.222222	0.222222	0.166667	0.777778	0.5	0.166667	0.277778	0.166667	0.166667	0.777778	0.222222	0.5	0.222222	0.777778	0.222222	0.277778	0.111111	0.166667	0.388889	0.277778	0.222222	0.111111	0.333333	0.222222	0.277778	0.277778	0.277778	0.111111	0.222222	0.111111	0.111111	0.277778	0.277778	0.277778	0.166667	0.111111	0.388889	0.222222	0.166667	0.277778	0.277778	0.166667	0.444444	0.5	0.444444
MA		MA	0.35	0.25	0.15	0.25	0.25	0.4	0.3	0.15	0.25	0.25	0.35	0.35	0.15	0.2	0.3	0.55	0.25	0.3	0.25	0.05	0.4	0.2	0.2	0.25	0.2	0.3	0.3	0.2	0.2	0.1	0.2	0.2	0.2	0.15	0.5	0.1	0.2	0.2	0.45	0.1	0.15	0.35	0.4	0.15	0.3	0.3	0.25
MRL		MRL	0.555556	0.611111	0.333333	0.5	0.333333	0.444444	0.388889	0.444444	0.444444	0.555556	0.5	0.333333	0.5	0.555556	0.166667	0.5	0.166667	0.388889	0.333333	0.277778	0.5	0.555556	0.333333	0.388889	0.555556	0.388889	0.5	0.444444	0.444444	0.5	0.555556	0.388889	0.388889	0.5	0.333333	0.388889	0.444444	0.333333	0.5	0.222222	0.333333	0.5	0.555556	0.333333	0.277778	0.333333	0.333333
NOR		NOR	0.222222	0.277778	0.166667	0.111111	0.277778	0.388889	0.166667	0.166667	0.333333	0.388889	0.277778	0.277778	0.166667	0.166667	0.222222	0.333333	0.222222	0.222222	0.222222	0.222222	0.222222	0.166667	0.277778	0.333333	0.277778	0.166667	0.444444	0.222222	0.166667	0.222222	0.277778	0.333333	0.333333	0.277778	0.333333	0.166667	0.222222	0.222222	0.333333	0.333333	0.166667	0.388889	0.388889	0.166667	0.277778	0.277778	0.333333
NZW		NZW	0.222222	0.222222	0.277778	0.222222	0.277778	0.277778	0.166667	0.222222	0.277778	0.277778	0.277778	0.277778	0.222222	0.333333	0.388889	0.333333	0.444444	0.222222	0.166667	0.222222	0.166667	0.277778	0.277778	0.222222	0.222222	0.222222	0.222222	0.277778	0.277778	0.222222	0.277778	0.333333	0.333333	0.222222	0.222222	0.166667	0.277778	0.166667	0.388889	0.0555556	0.277778	0.166667	0.222222	0.222222	0.111111	0.166667	0.166667
PL		PL	0.5	0.444444	0.333333	0.333333	0.166667	0.444444	0.388889	0.333333	0.388889	0.444444	0.277778	0.444444	0.388889	0.388889	0.277778	0.5	0.277778	0.111111	0.111111	0.277778	0.333333	0.388889	0.388889	0.111111	0.277778	0.333333	0.388889	0.333333	0.333333	0.277778	0.388889	0.111111	0.111111	0.5	0.388889	0.388889	0.444444	0.111111	0.444444	0.277778	0.333333	0.333333	0.444444	0.333333	0.388889	0.388889	0.333333
RIIIS		RIIIS	0.333333	0.388889	0.166667	0.166667	0.0555556	0.333333	0.111111	0.222222	0.444444	0.277778	0.277778	0.5	0.166667	0.222222	0.277778	0.5	0.277778	0.111111	0.0555556	0.166667	0.166667	0.166667	0.333333	0.0555556	0.333333	0.222222	0.166667	0.166667	0.166667	0.222222	0.222222	0.111111	0.111111	0.166667	0.166667	0.277778	0.222222	0.111111	0.333333	0.166667	0.166667	0.333333	0.388889	0.166667	0.277778	0.277778	0.222222
SB		SB	0.444444	0.444444	0.166667	0.222222	0.5	0.388889	0.222222	0.222222	0.333333	0.277778	0.611111	0.222222	0.277778	0.444444	0.388889	0.388889	0.388889	0.444444	0.555556	0.166667	0.5	0.277778	0.222222	0.555556	0.277778	0.222222	0.611111	0.333333	0.333333	0.222222	0.222222	0.5	0.5	0.333333	0.388889	0.166667	0.166667	0.5	0.388889	0.222222	0.166667	0.388889	0.388889	0.166667	0.277778	0.5	0.555556
SEA		SEA	0.315789	0.473684	0.421053	0.315789	0.421053	0.210526	0.210526	0.526316	0.631579	0.473684	0.578947	0.210526	0.421053	0.421053	0.105263	0.368421	0.105263	0.421053	0.473684	0.473684	0.473684	0.473684	0.421053	0.421053	0.473684	0.368421	0.526316	0.473684	0.473684	0.526316	0.578947	0.684211	0.684211	0.578947	0.210526	0.315789	0.421053	0.421053	0.263158	0.368421	0.421053	0.368421	0.526316	0.368421	0.315789	0.315789	0.315789
SJL		SJL	0.388889	0.388889	0.277778	0.222222	0.277778	0.555556	0.444444	0.333333	0.388889	0.222222	0.333333	0.5	0.444444	0.444444	0.277778	0.5	0.277778	0.5	0.277778	0.222222	0.666667	0.5	0.333333	0.277778	0.333333	0.388889	0.388889	0.444444	0.444444	0.333333	0.388889	0.277778	0.277778	0.388889	0.5	0.333333	0.277778	0.277778	0.444444	0.222222	0.277778	0.333333	0.5	0.277778	0.444444	0.555556	0.5
Swiss Webster-Male Zyagen		Swiss Webster-Male Zyagen	0.37037	0.333333	0.148148	0.296296	0.259259	0.555556	0.481481	0.222222	0.37037	0.296296	0.333333	0.555556	0.222222	0.296296	0.222222	0.518519	0.222222	0.296296	0.185185	0.148148	0.407407	0.296296	0.259259	0.185185	0.222222	0.222222	0.333333	0.296296	0.296296	0.222222	0.185185	0.222222	0.222222	0.296296	0.407407	0.259259	0.222222	0.185185	0.333333	0.222222	0.148148	0.37037	0.37037	0.185185	0.444444	0.407407	0.333333
Swiss Webster-Female Zyagen		Swiss Webster-Female Zyagen	0.434783	0.434783	0.173913	0.26087	0.304348	0.521739	0.565217	0.173913	0.26087	0.304348	0.304348	0.565217	0.173913	0.391304	0.217391	0.521739	0.217391	0.304348	0.217391	0.173913	0.347826	0.217391	0.26087	0.217391	0.26087	0.173913	0.347826	0.26087	0.26087	0.130435	0.173913	0.26087	0.26087	0.347826	0.347826	0.217391	0.217391	0.217391	0.347826	0.217391	0.173913	0.391304	0.304348	0.173913	0.391304	0.391304	0.391304
[truncated: 45 more columns]
